# Supplementary material for: Assessing species diversity of Coral Triangle artisanal fisheries: A DNA barcode reference library for the shore fishes retailed at Ambon harbor (Indonesia)
Source: PubMed Central journal article supplement (PMC7141007; doi:10.1002/ece3.6128), 2020-03-06

# BOLD TaxonID Tree

Title : Tree Result - DBMFA  
Date : 20-May-2019  
Data Type : Nucleotide  
Distance Model : Kimura 2 Parameter  
Marker : COI-5P  
Colourization : [blue]=Stop Codons [red]=Contamination or misidentification

Label : Sample ID  
Label : Process ID  
Label : Taxon  
Label : Barcode Cluster (BIN)

Sequence Count : 696  
Species count : 202  
Genus count : 73  
Family count : 24  
Unidentified : 4

BIN Count : 205

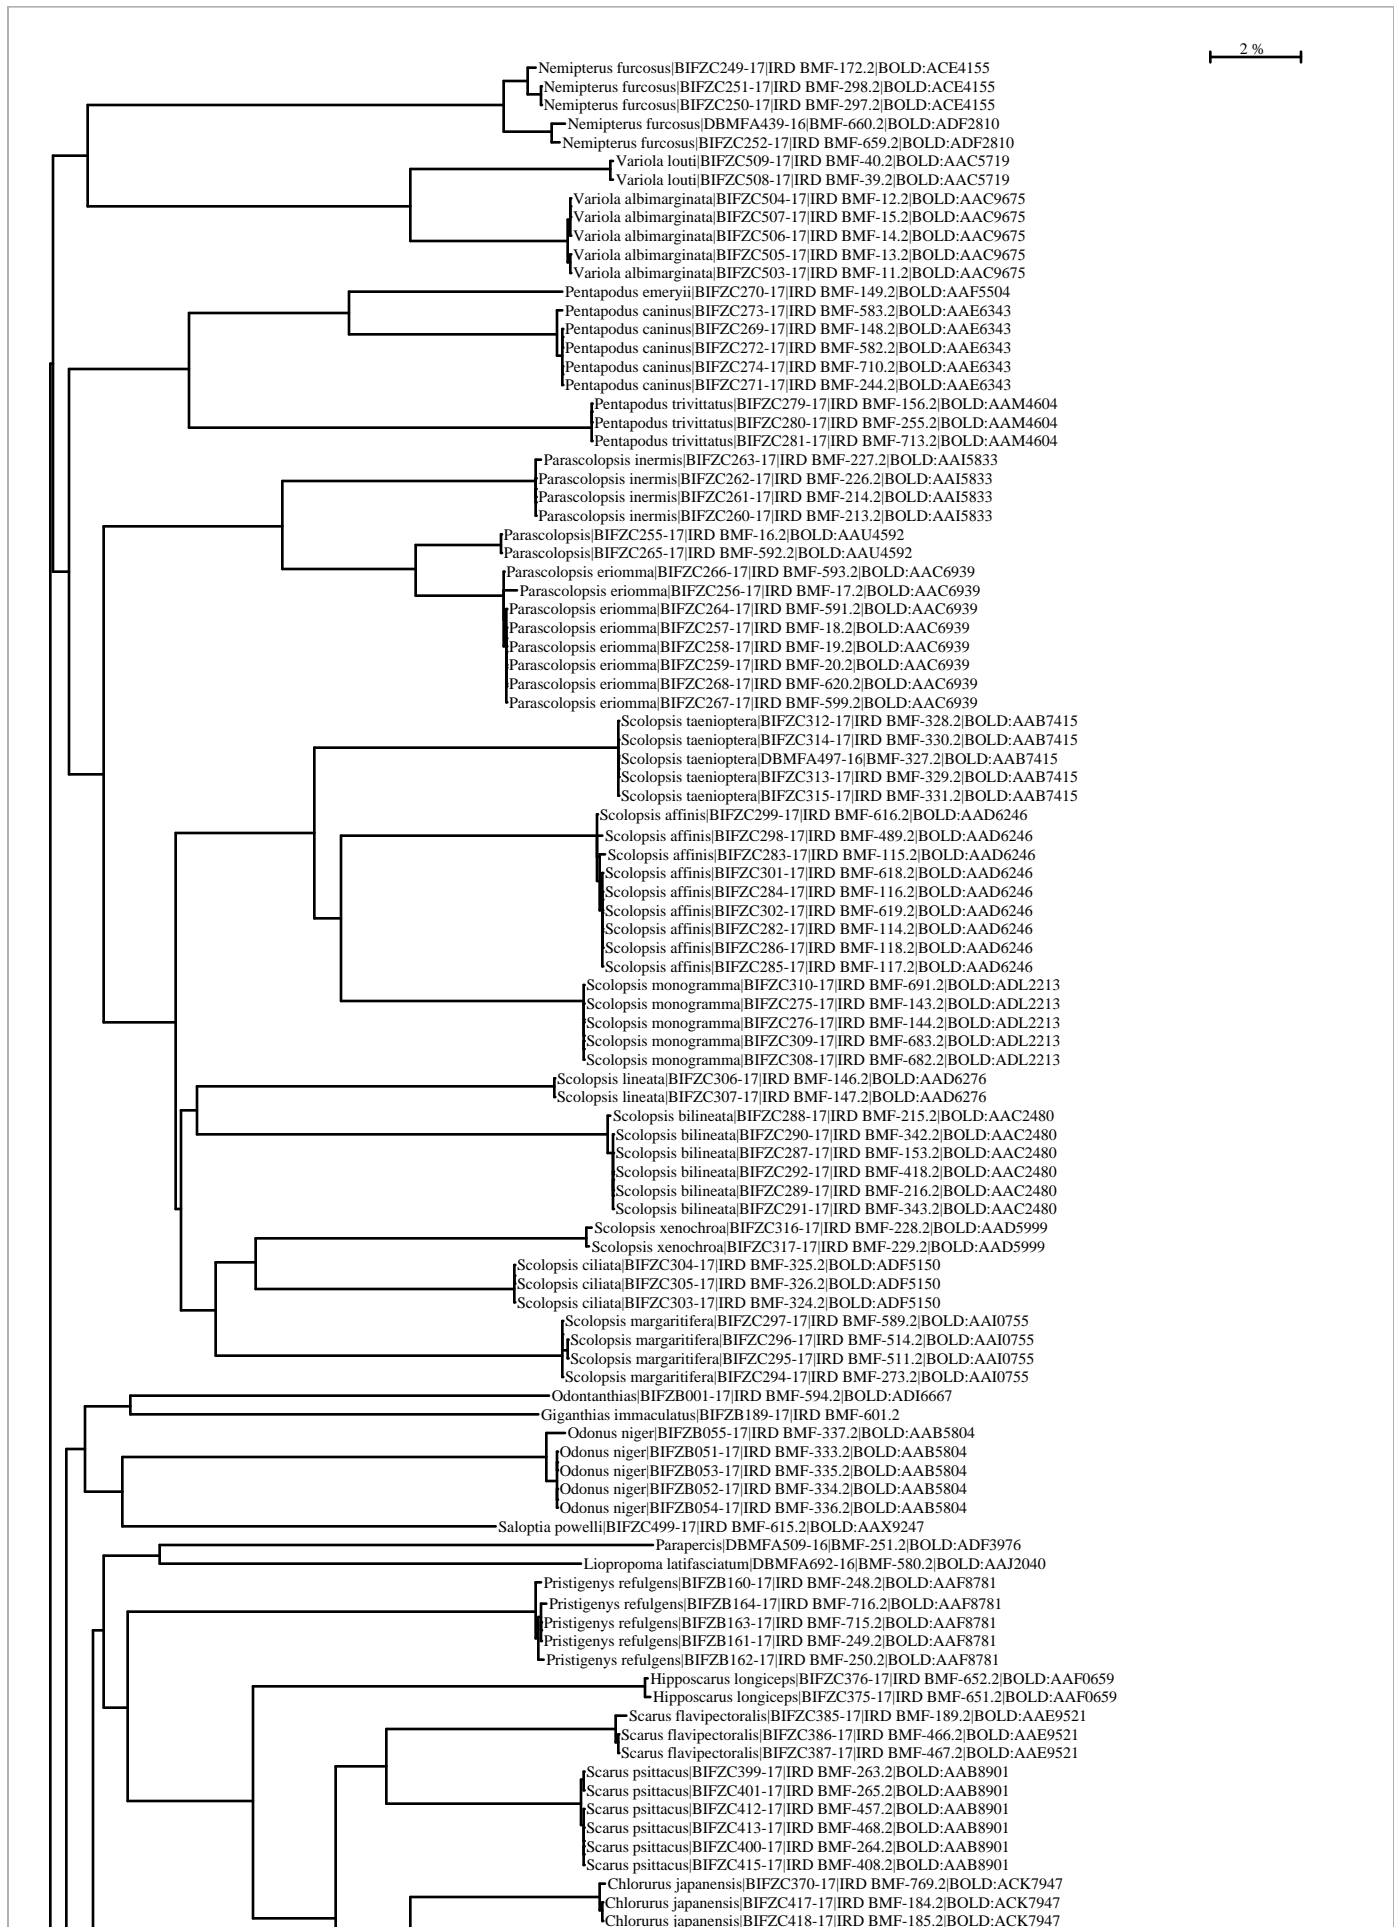

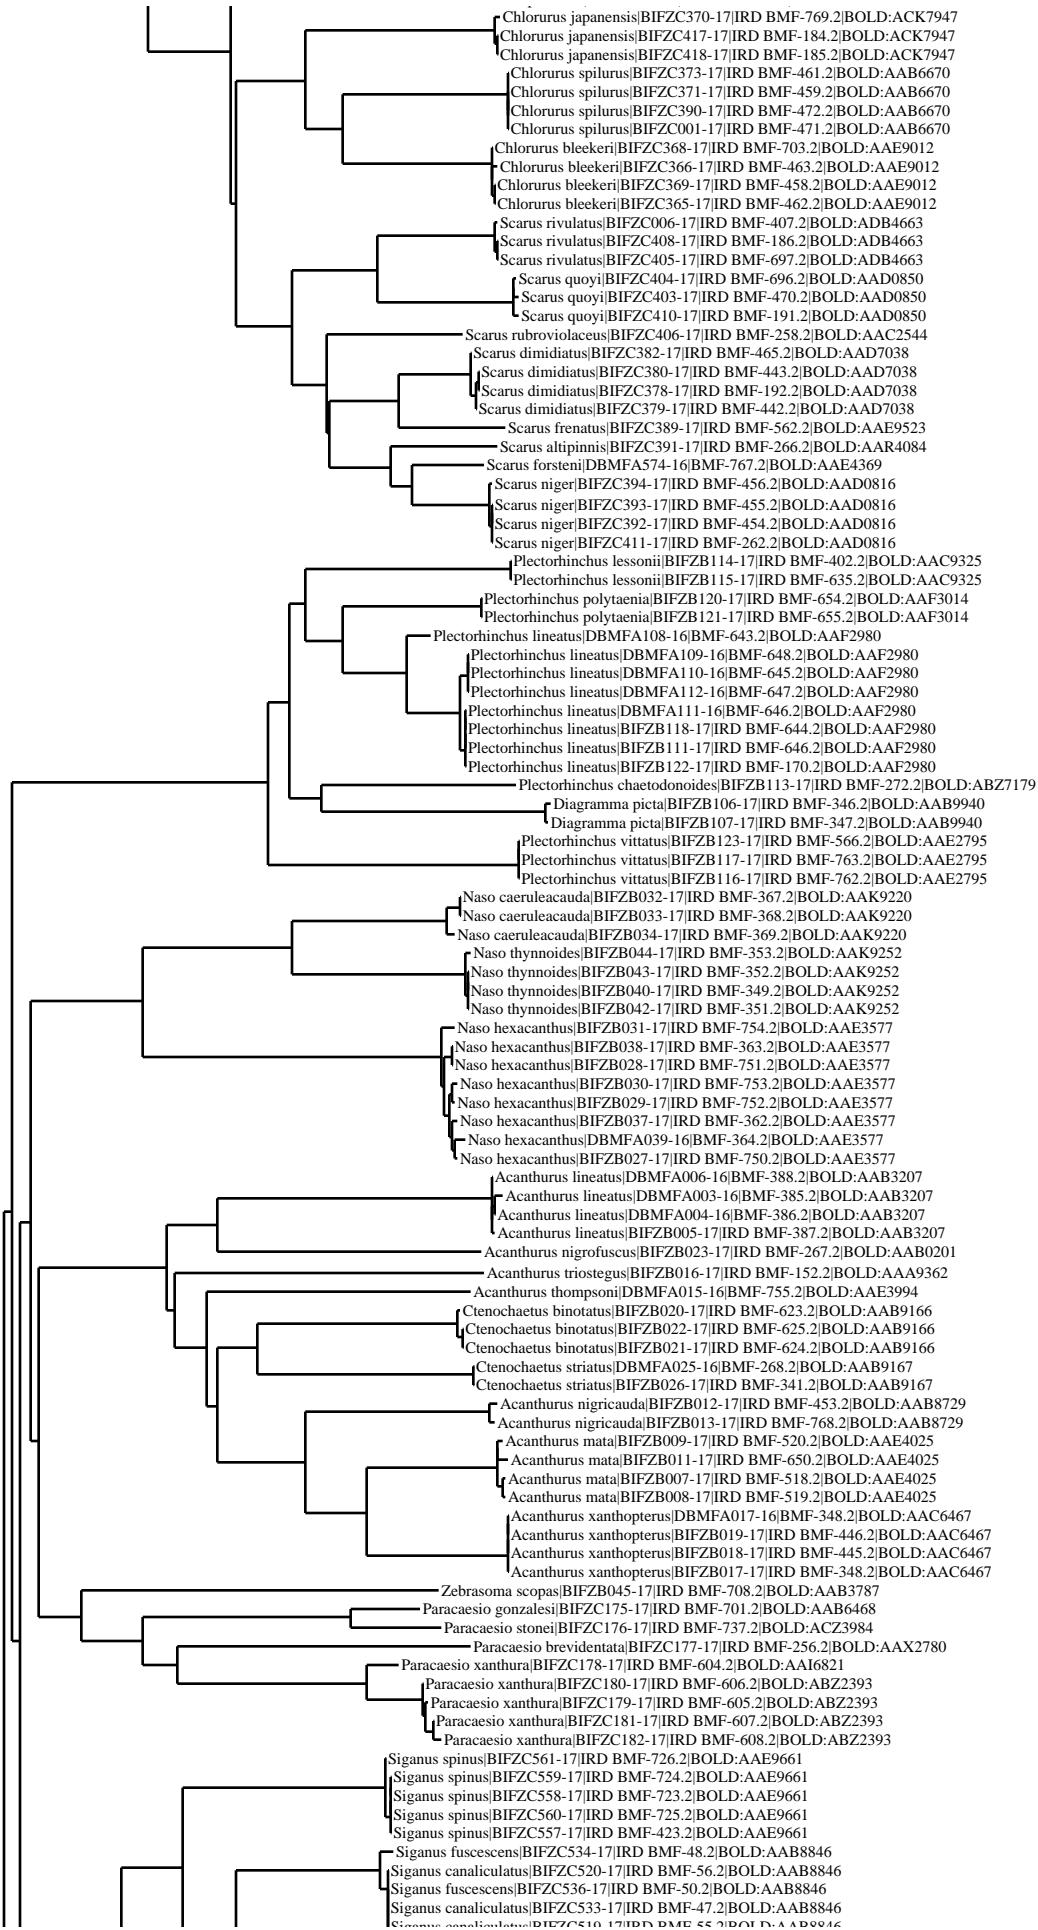

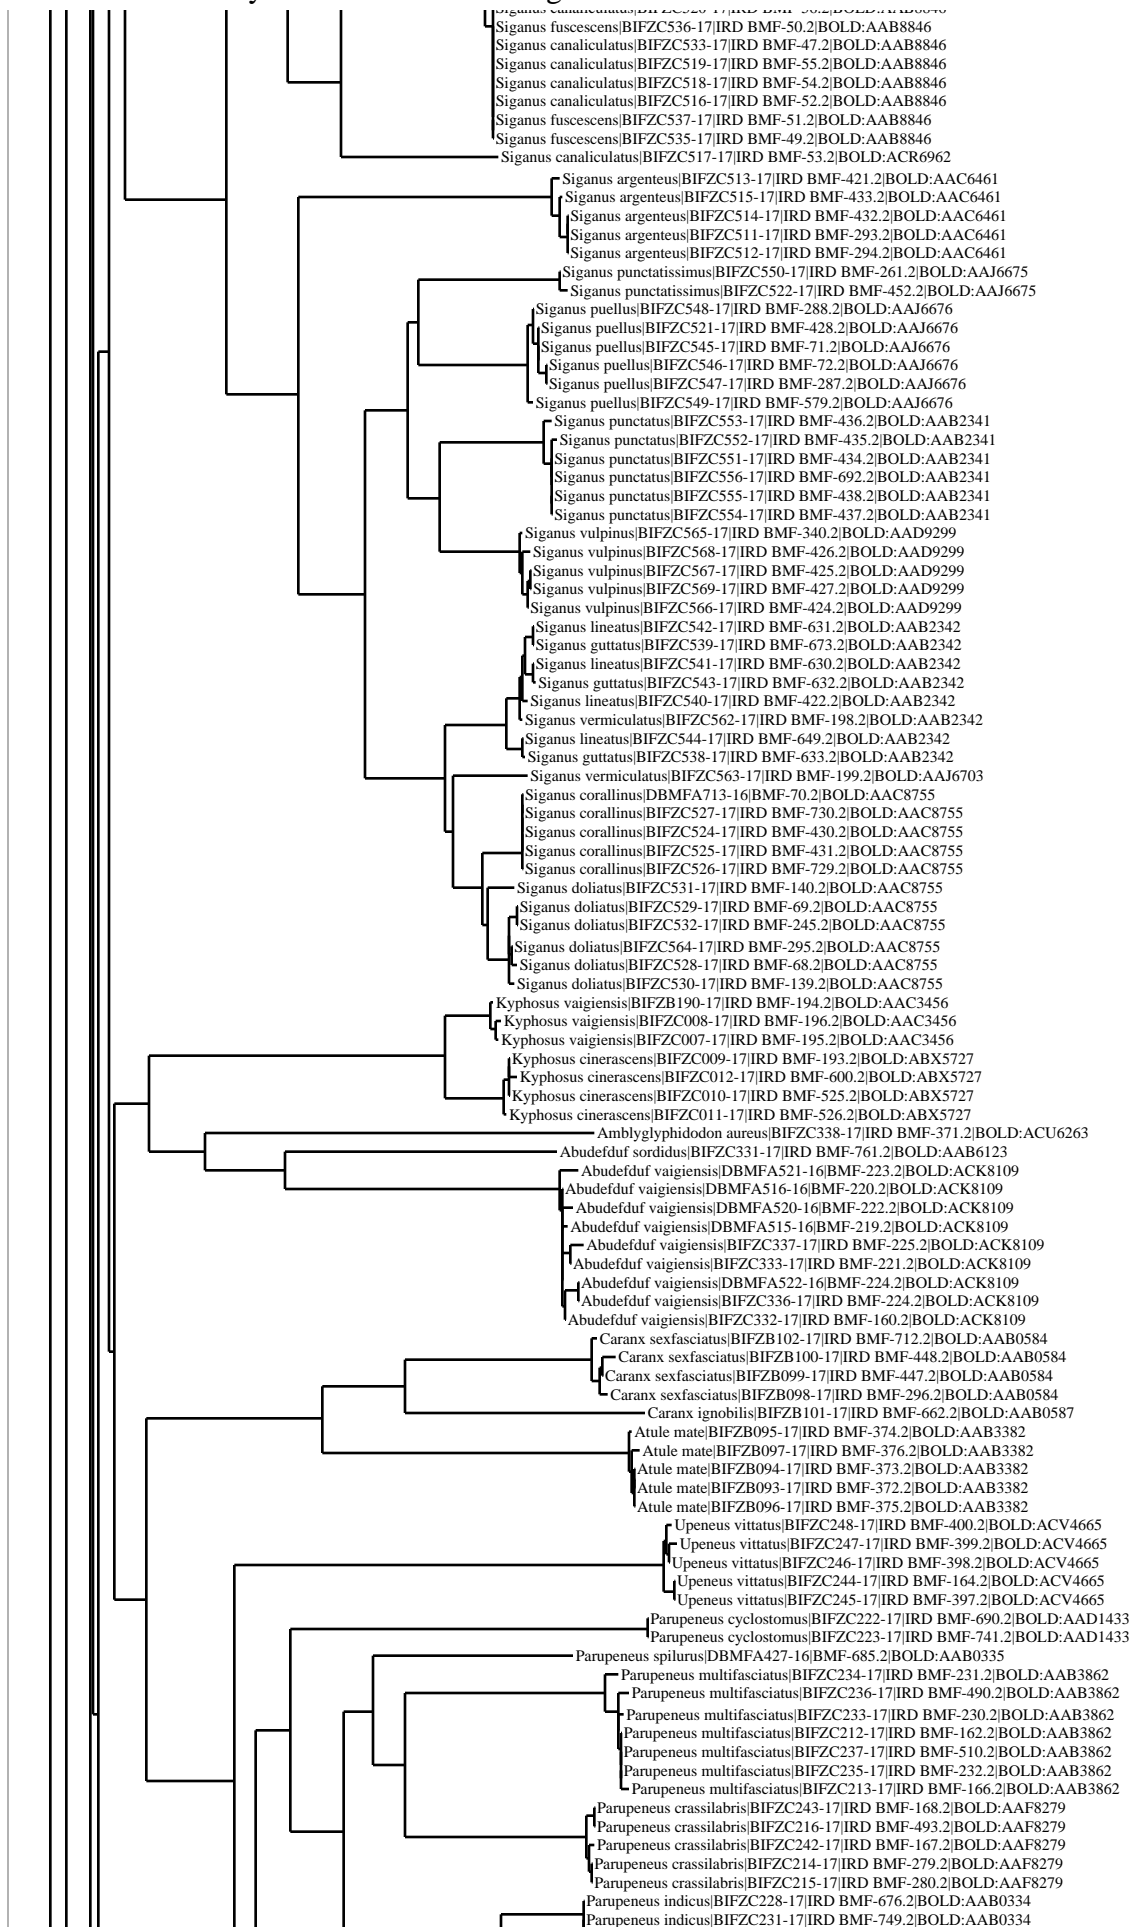

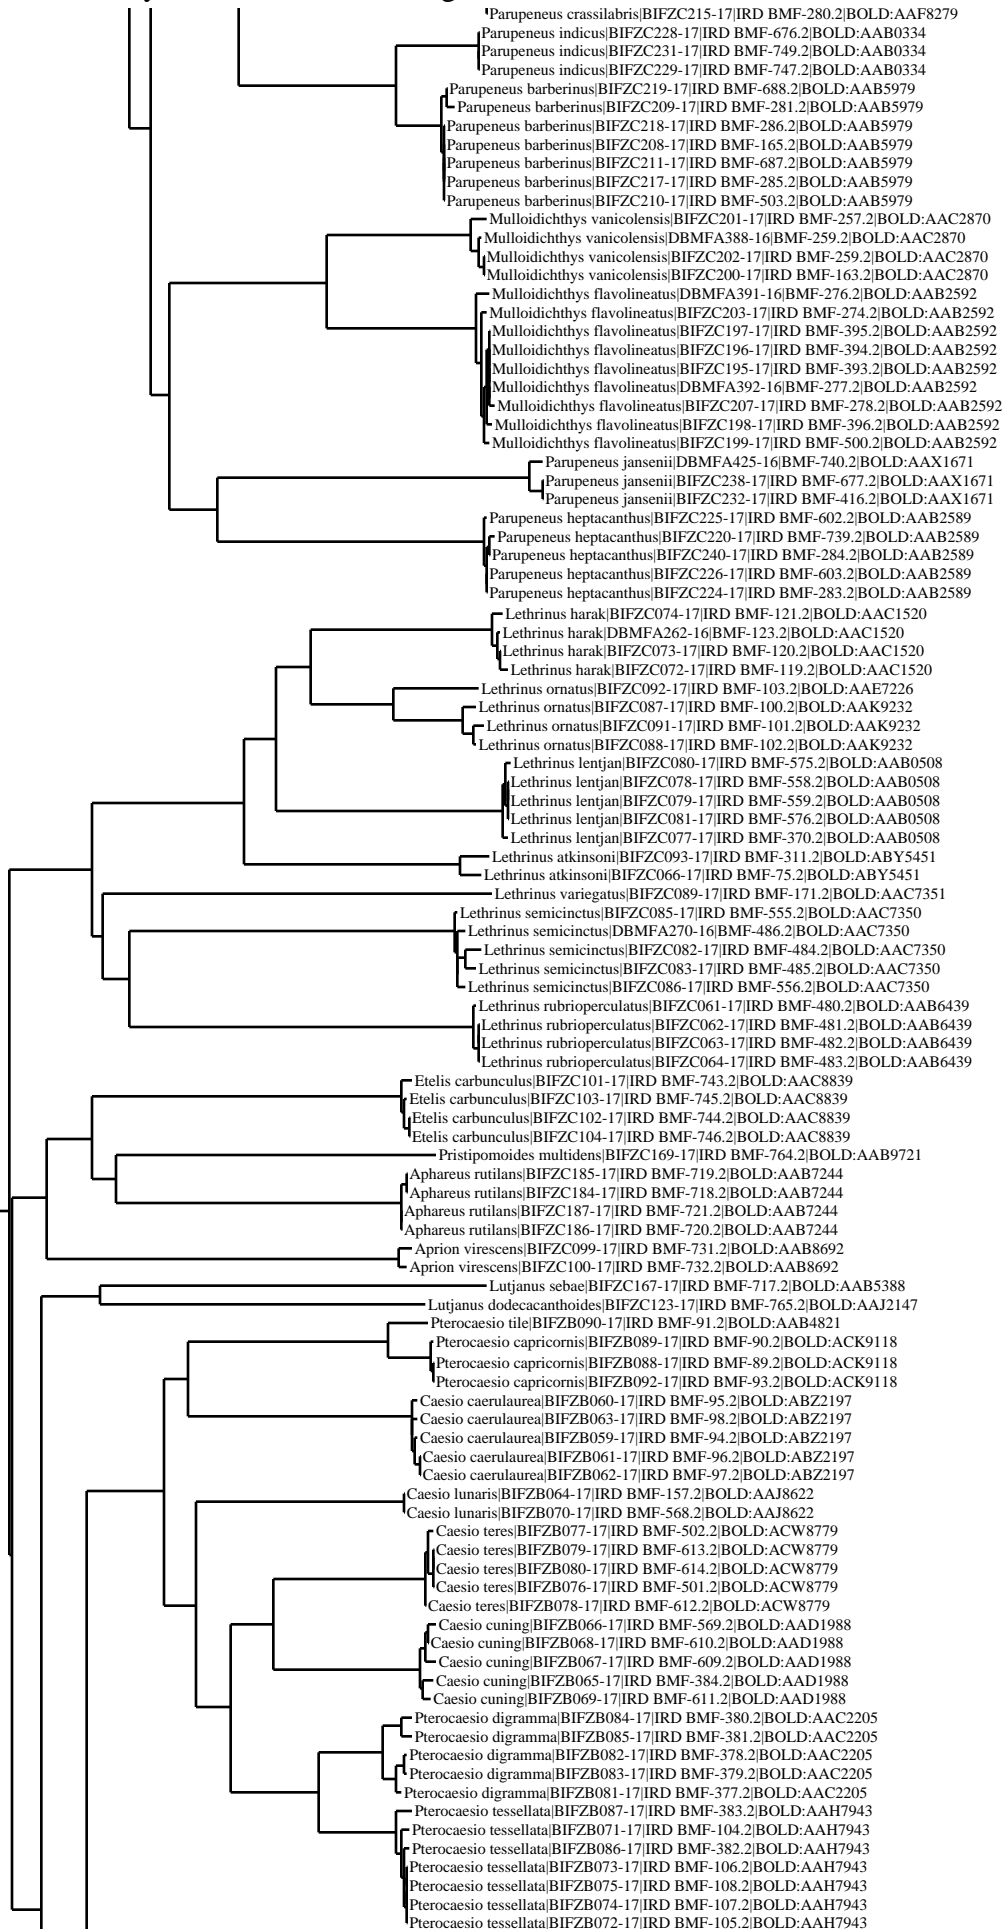

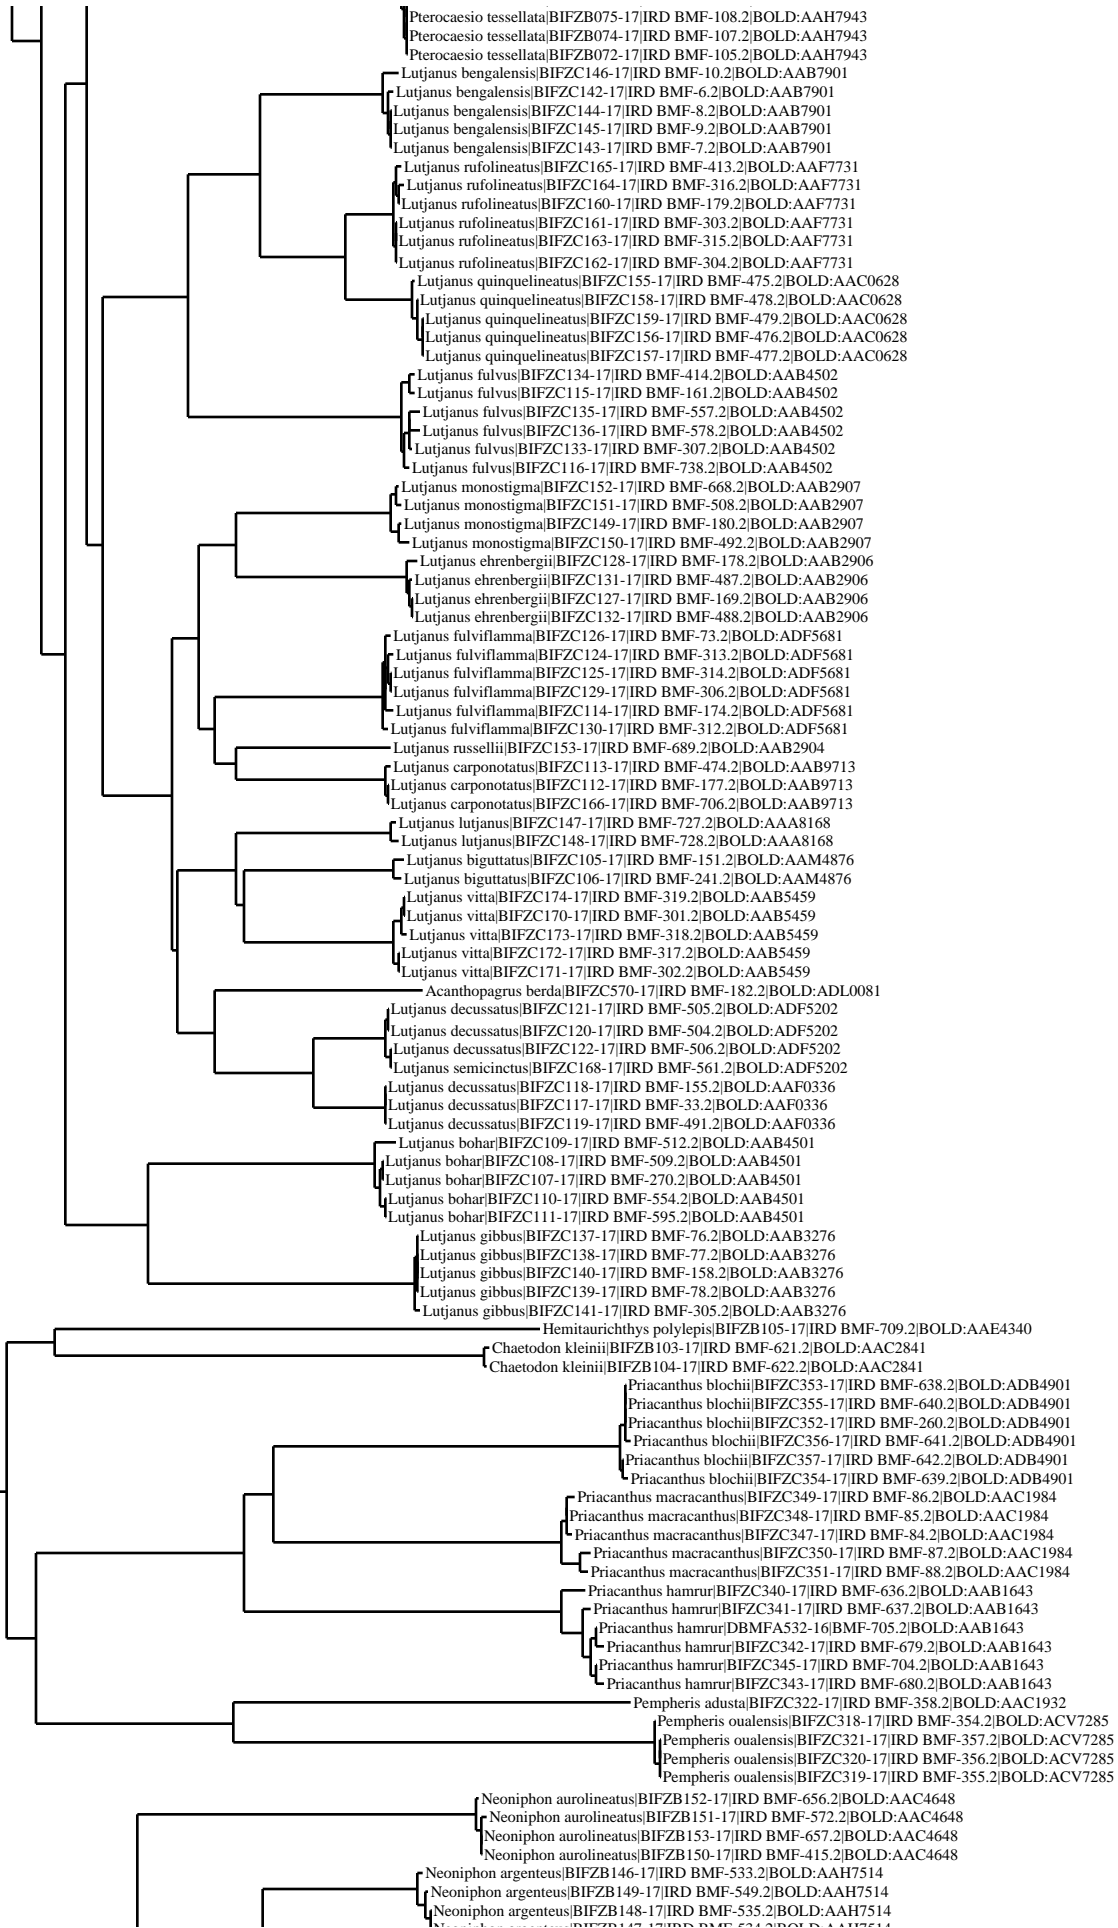

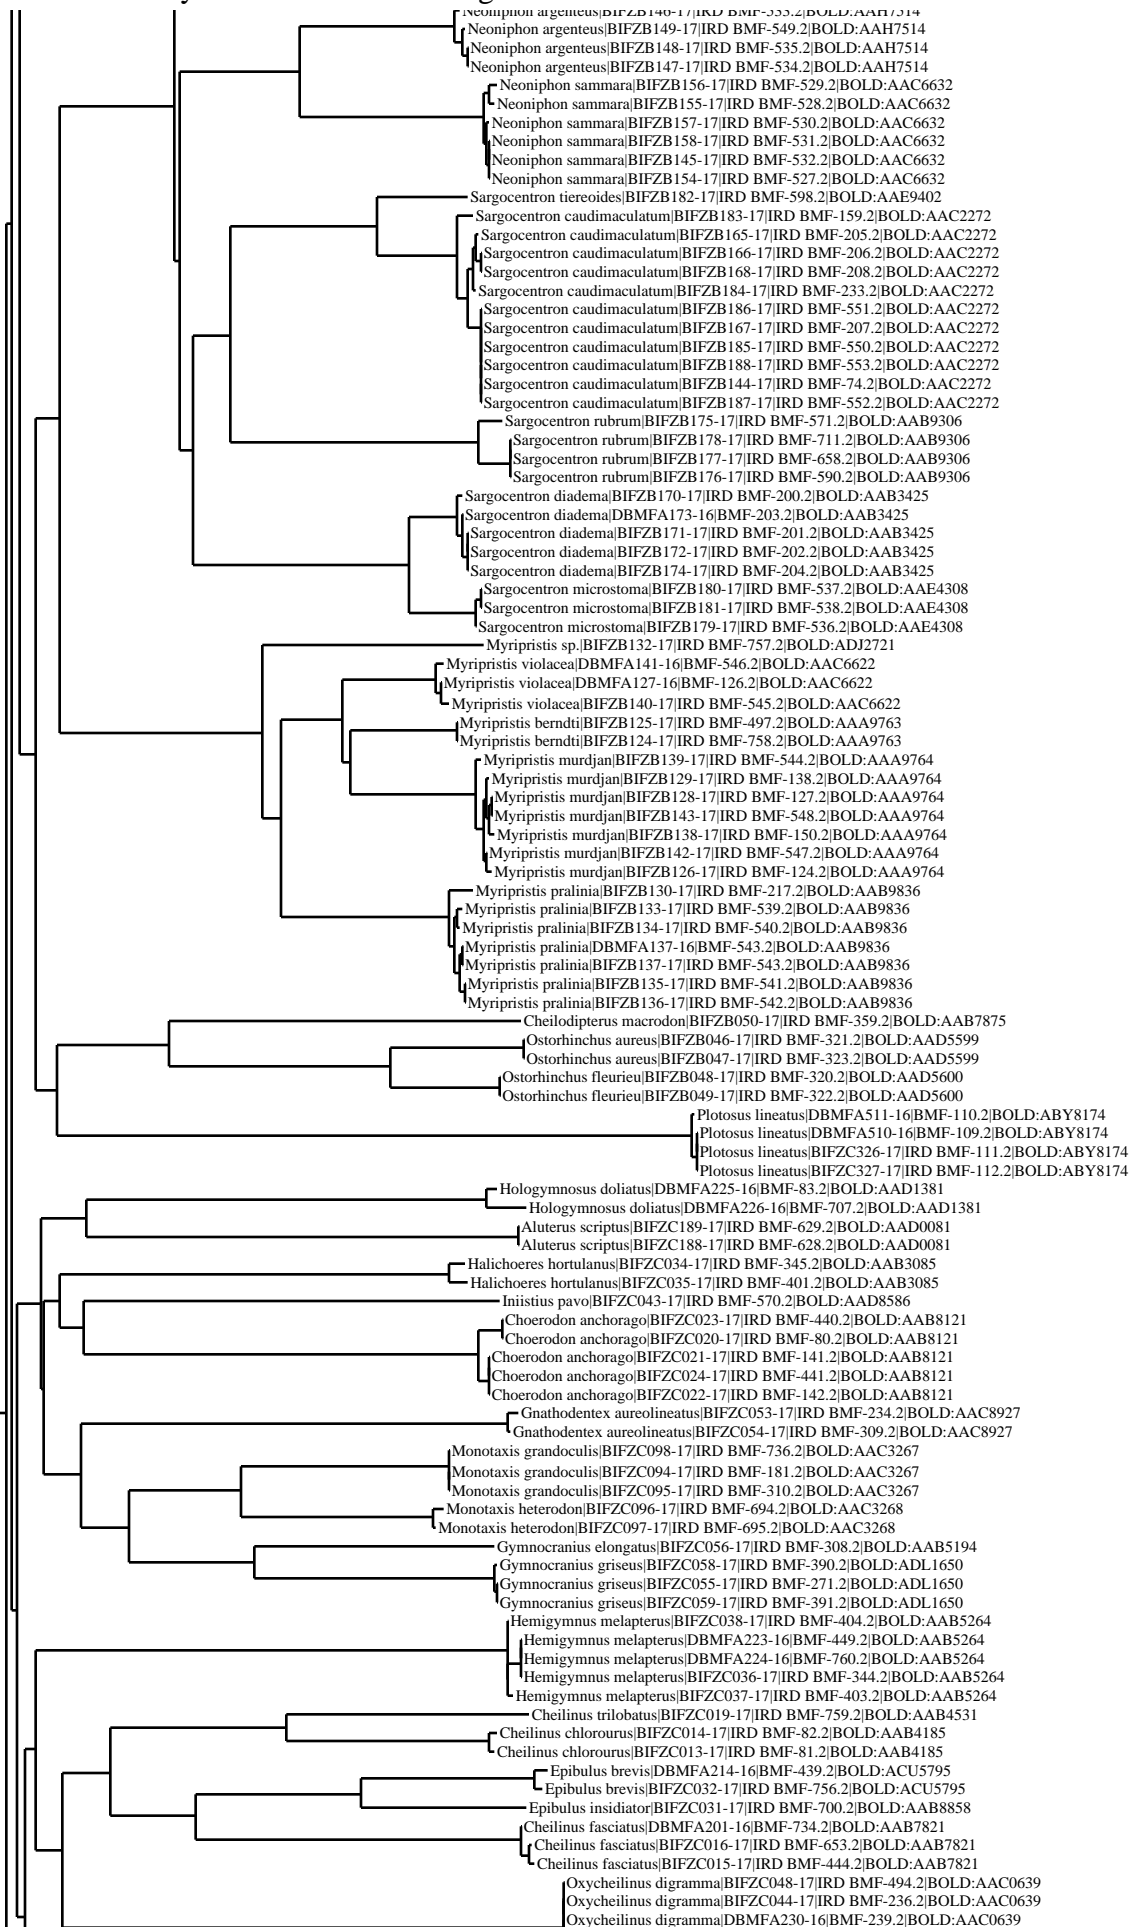

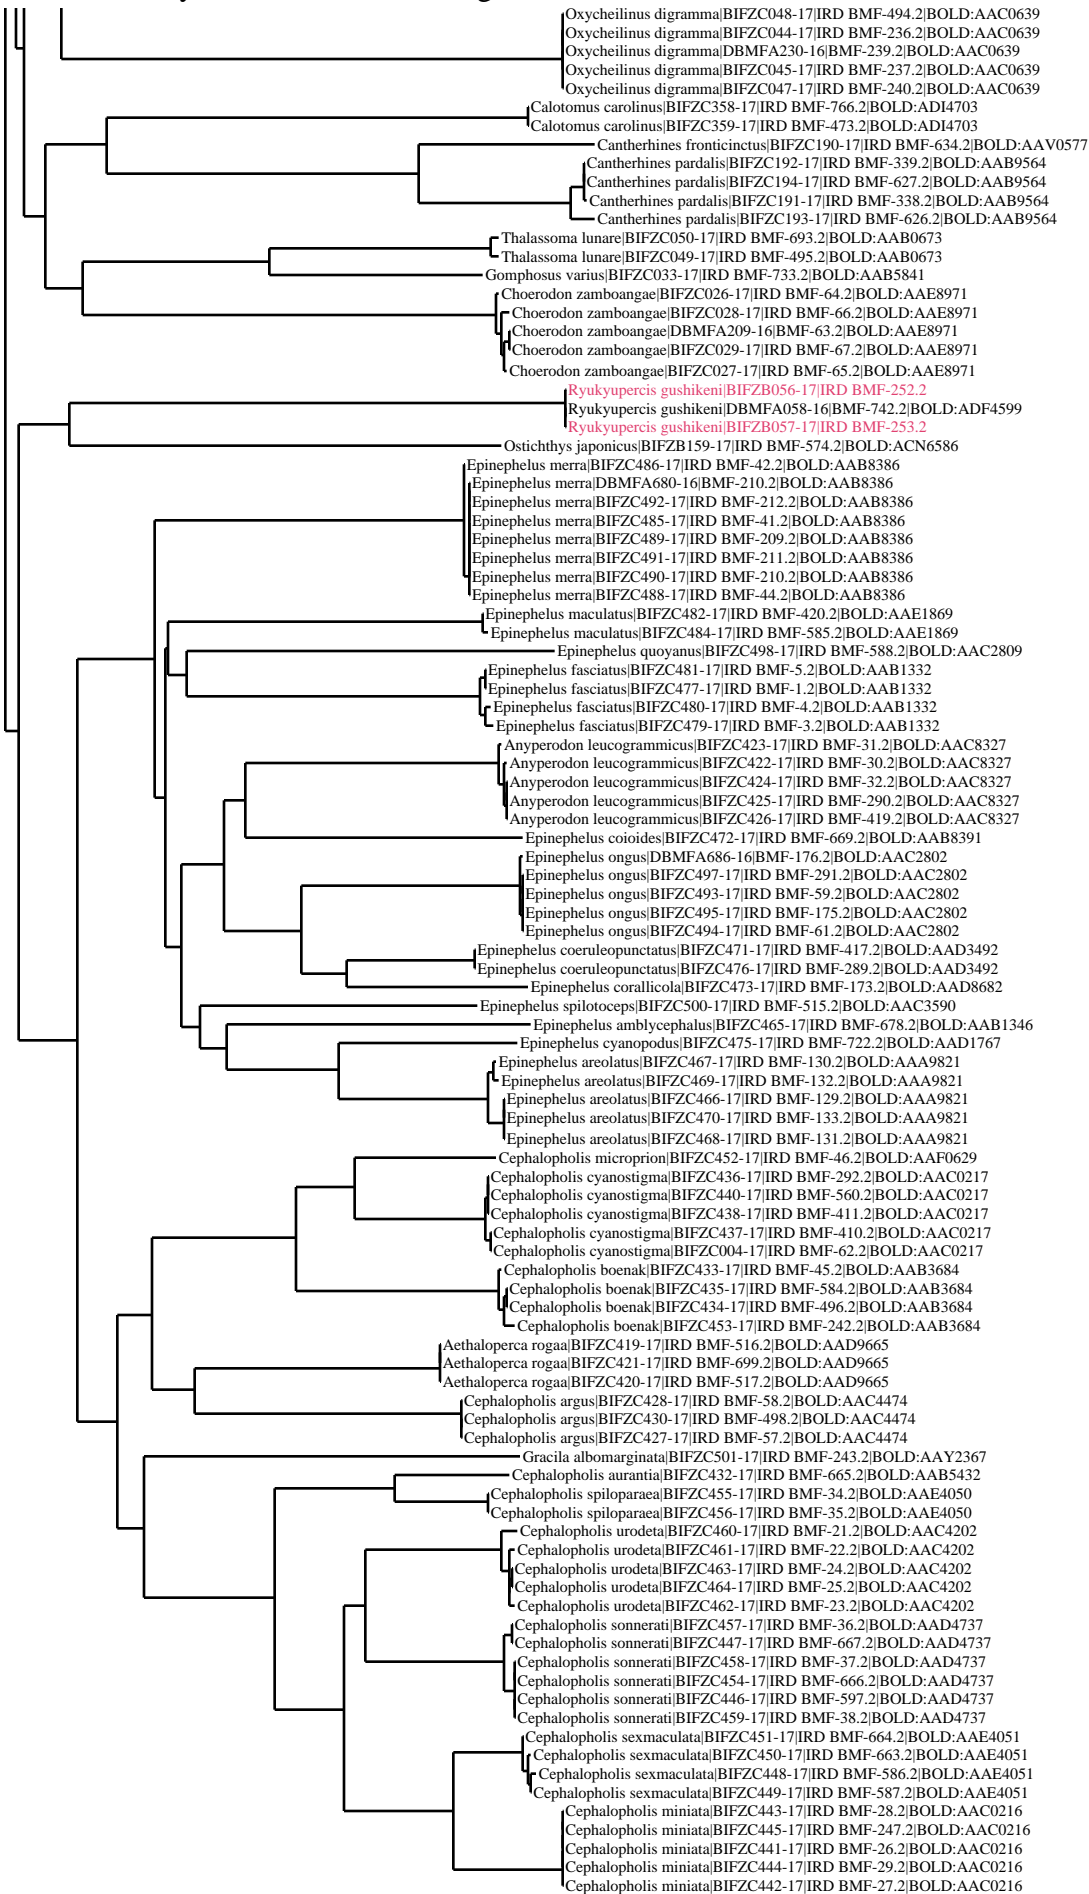

Supplement: ECE3-10-3356-s001.pdf [file ECE3-10-3356-s001.pdf]
